# Supplementary material
Source: PubMed Central journal article supplement (PMC3859404)
Supplement: JCI70405sd.pdf [file JCI70405sd.pdf]

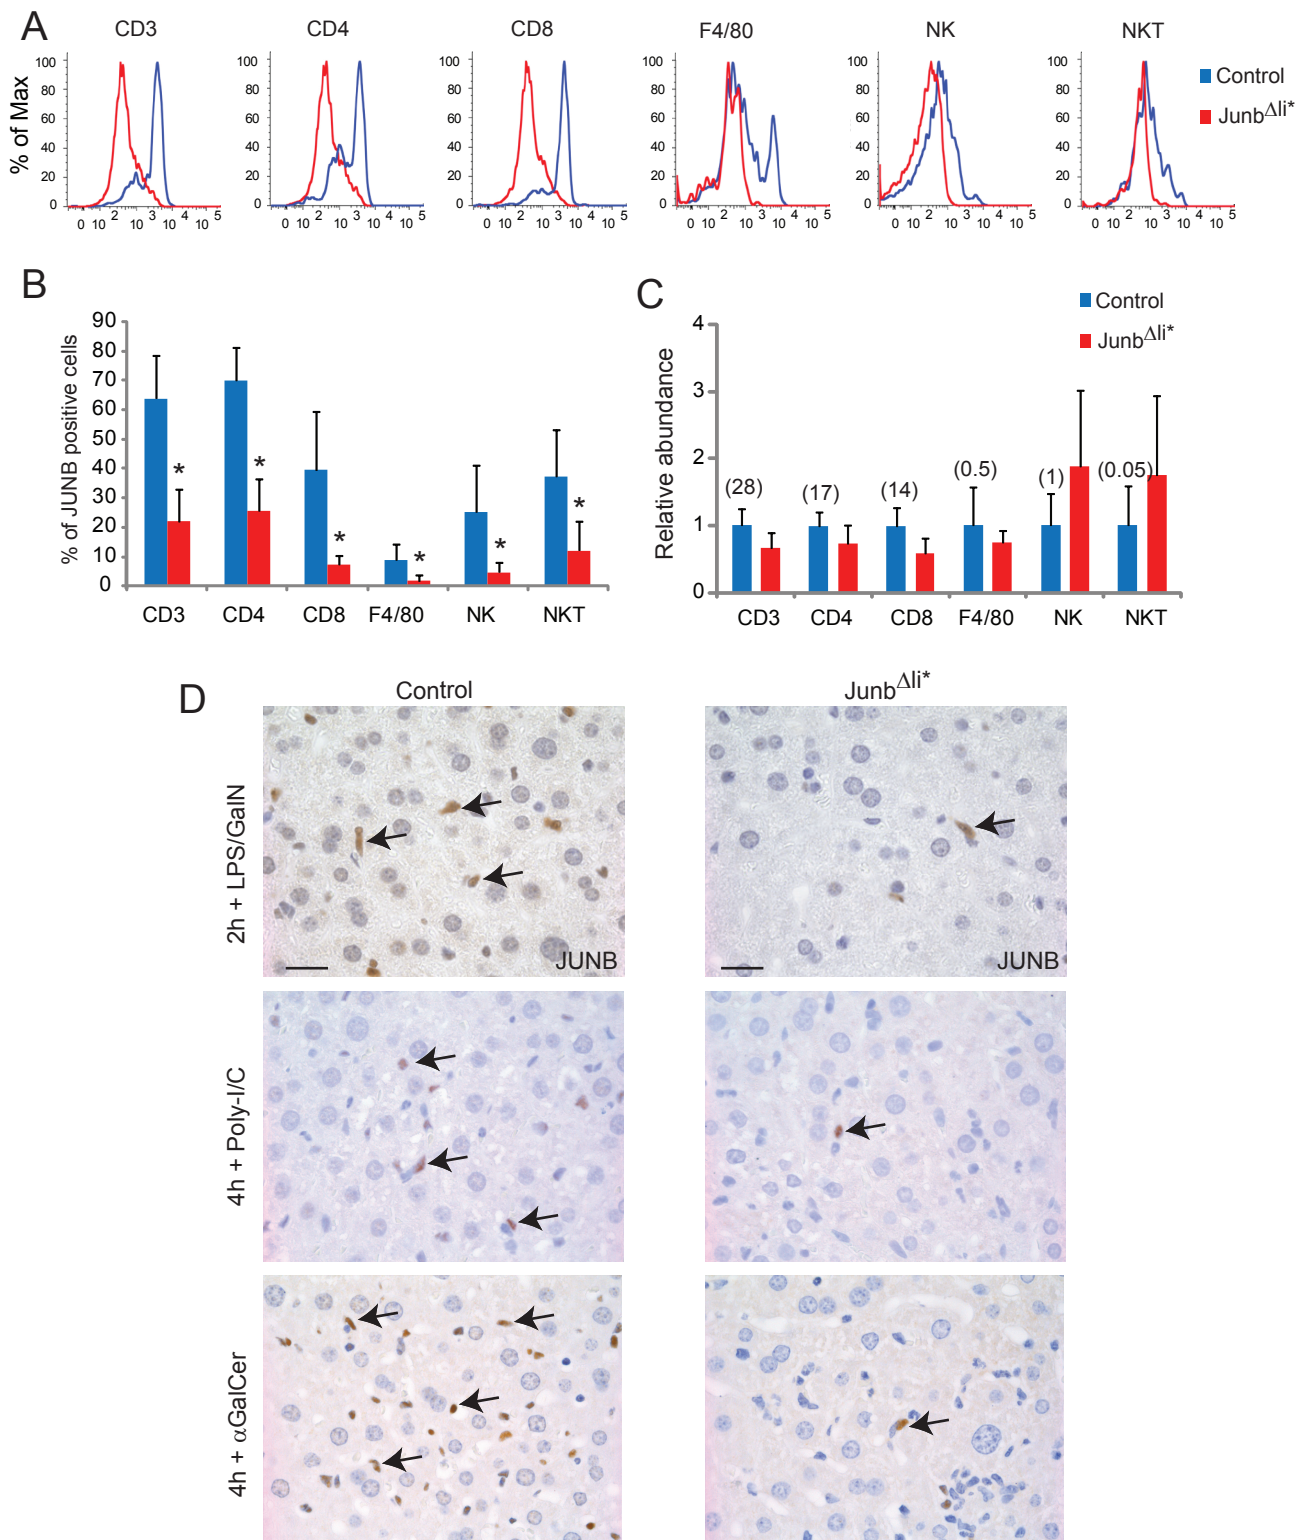

**Figure S1: Liver immune cells express JunB during hepatitis in 4 independent models.**

**A-C:** Immune cells isolated from the liver of control and JunB<sup>Δli\*</sup> mice after treatment with ConA were analyzed by flow cytometry. Cells were stained for JunB and cell surface markers to discriminate the different cell populations. Populations were gated as follow: T-cells: CD3+, NK1.1-. NK cells: CD3-, NK1.1+. NKT cells: CD3+, NK1.1+. CD4 positive T-cells CD4+, CD8-. CD8 positive T-cells: CD4-, CD8+. Macrophages and monocytes: F4/80+.

**A:** Insensitive of JunB staining in each shown cell populations. A representative experiment is shown.

**B:** Quantification of JunB-positive cells in the different populations.

**C:** Relative abundance of the different immune populations in the liver of control and JunB<sup>Δli\*</sup> mice after ConA treatment. Controls are set to 1 and the numbers in brackets indicate the percentage of each population relative to total immune cells in controls. n=7, 6; \*p< 0.05.

**D:** Liver sections from controls and JunB<sup>Δli\*</sup> mice treated with LPS/GaIN, Poly-I/C or  $\alpha$ GalCre for the indicated times were stained for JunB (brown). Black arrowheads indicate JunB-positive cells. n>3, one representative experiment is shown. Scale bar = 20 $\mu$ m.

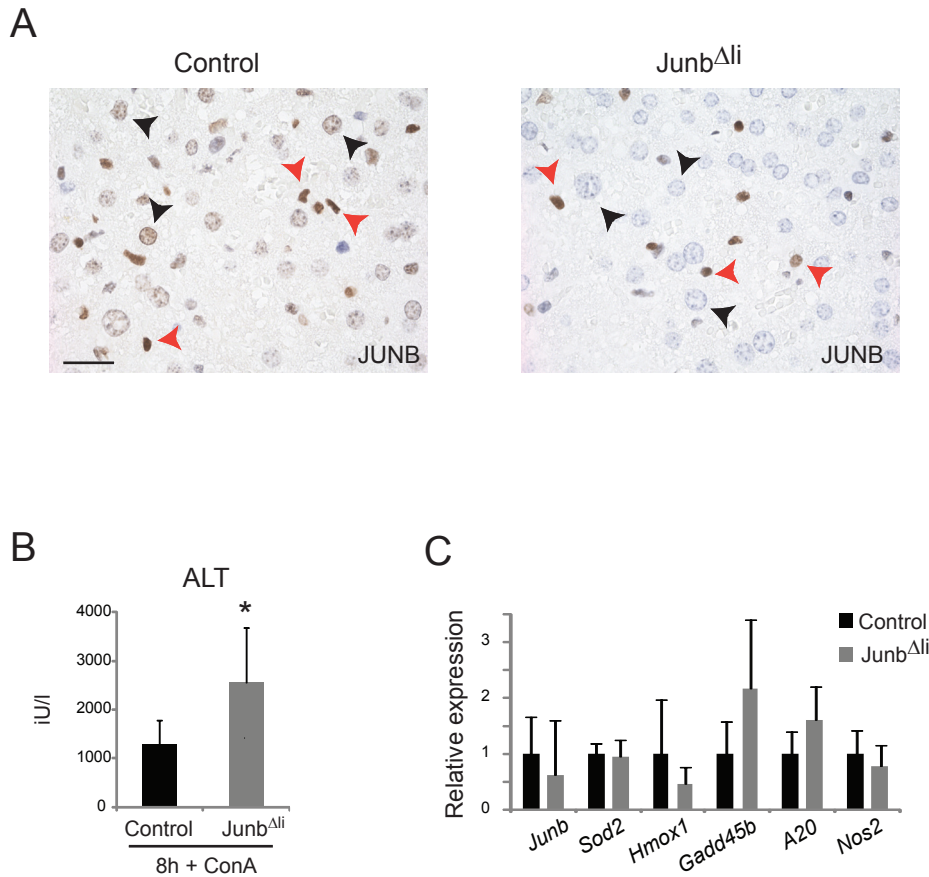

**Figure S2: Specific deletion of junb in hepatocytes leads to increased liver damage after ConA.**

**A:** Liver sections from control (JunB<sup>+/flox</sup>; Alfp:Cre<sup>T/+</sup>) and JunB<sup>Δli</sup> mice (JunB<sup>flox/flox</sup>; Alfp:Cre<sup>T/+</sup>) treated with ConA for 2 hours were stained for JunB (brown). Black arrowheads indicate hepatocytes and red arrowheads marks immune cells. n>5, one representative experiment is shown. Scale bar = 20μm. ALT levels (**B:** n=10) and qRT-PCR for stress-related genes (**C:** n>5) in controls (JunB<sup>+/flox</sup>; Alfp:Cre<sup>T/+</sup>) and JunB<sup>Δli</sup> (JunB<sup>flox/flox</sup>; Alfp:Cre<sup>T/+</sup>) mice 8 hours after ConA injection. \*p < 0.05.

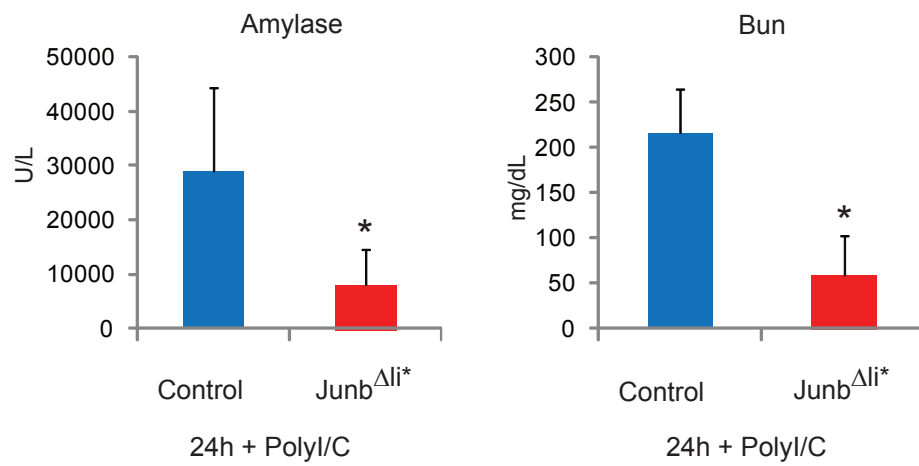

**Figure S3: JunB<sup>Δli\*</sup> mice display signs of decreased systemic inflammation.** Amylase and blood urea nitrogen (Bun) in the serum of control and JunB<sup>Δli\*</sup> mice 24 hours after Poly I/C injection. n>5; \*p<0.05.

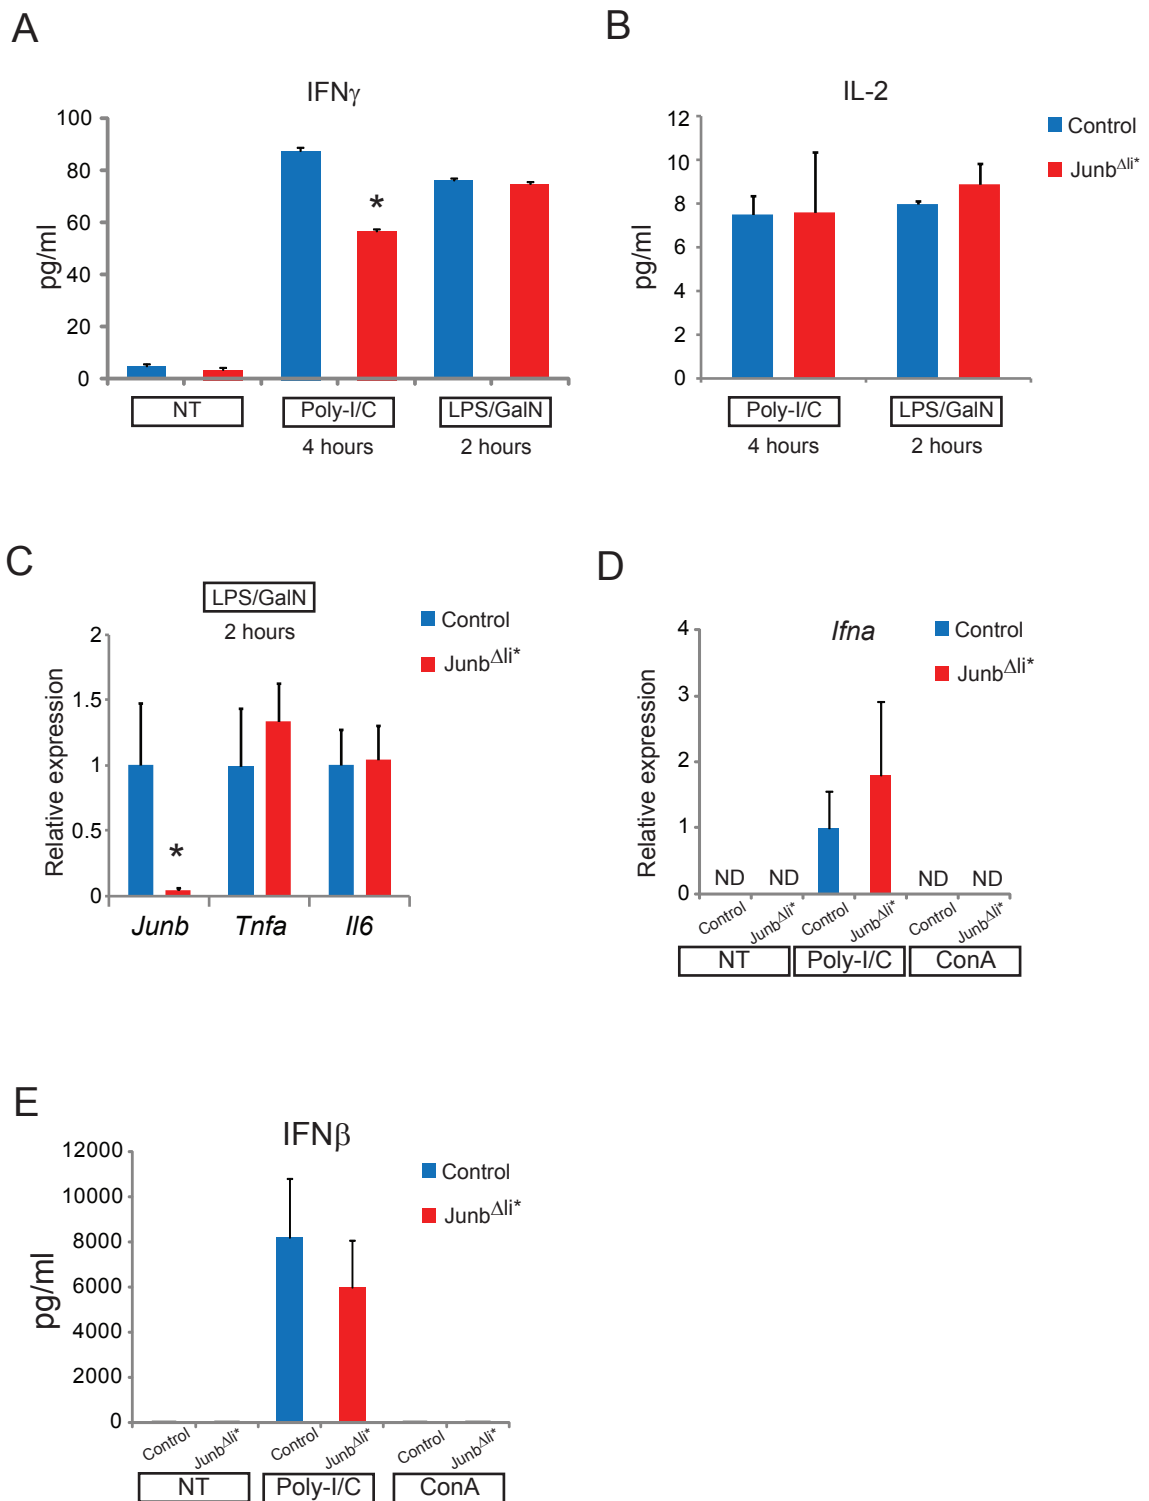

**Figure S4: Cytokine profiling in JunB $\Delta$ Ii\* mice subjected to different hepatitis paradigms.**

**A:** Serum Ifn $\gamma$  in control and JunB $\Delta$ Ii\* mice after Poly-I/C or LPS/GaIN. n=4, p<0.05.

**B:** qRT-PCR analysis of *junb* and *il-2* in the liver of control and JunB $\Delta$ Ii\* mice after Poly-I/C. n=4; \*p<0.05

**C:** qRT-PCR analysis of *junb* and cytokines expression in the liver of control and JunB $\Delta$ Ii\* mice after LPS/GaIN. n=4; \*p<0.05.

**D:** qRT-PCR analysis of *ifna* expression in the liver of control and JunB $\Delta$ Ii\* mice after Poly-I/C or ConA. n=4.

**E:** Serum Ifn $\beta$  in control and JunB $\Delta$ Ii\* mice after Poly-I/C or ConA. n=4.

**a**

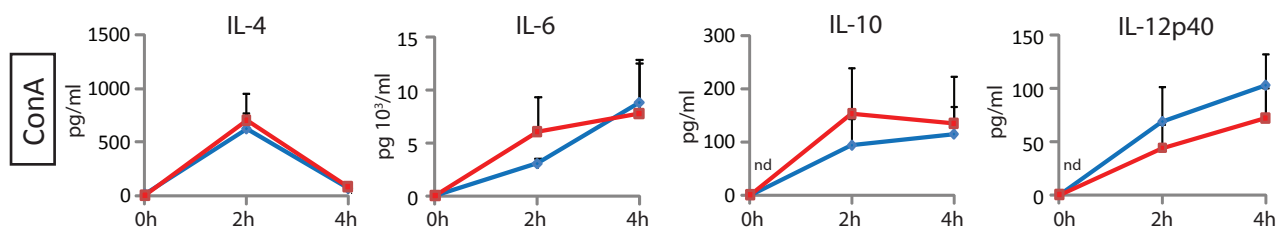

**b**

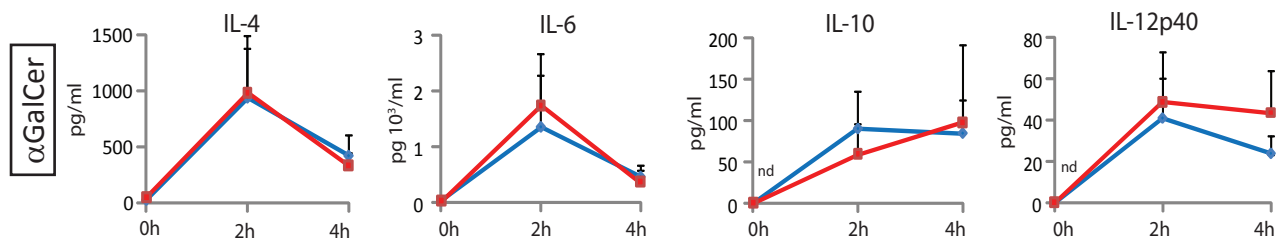

**Figure S5: Comparison of cytokine profiles in ConA- and  $\alpha GalCer$ -treated  $JunB^{\Delta Ii^*}$  mice.**

**a:** Serum cytokines were measured in control and  $JunB^{\Delta Ii^*}$  mice at 0 (n=3), 2 (n=5) or 4 (n=5) hours after ConA treatment. \* $p < 0.05$ .

**b:** Serum cytokines were measured in control and  $JunB^{\Delta Ii^*}$  mice at 0 (n=3), 2 (n=6) or 4 (n=6) hours after  $\alpha GalCer$  treatment. \* $p < 0.05$ .

A

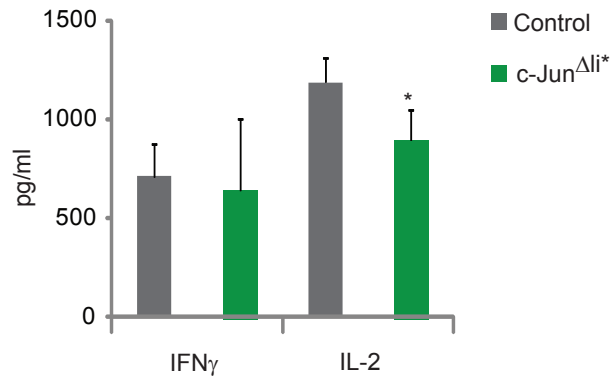

B

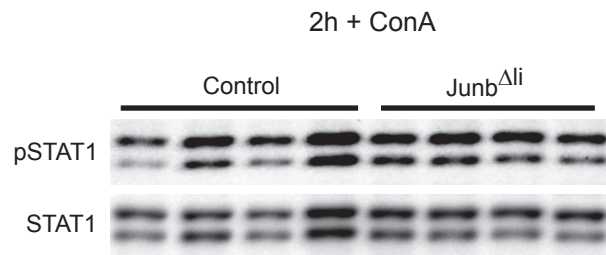

C

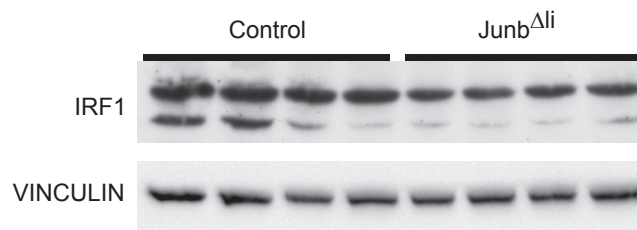

**Figure S6: IL-2 but not Ifn $\gamma$  is decreased in ConA-treated c-Jun-deficient mice and pStat1 and Irf1 are unaffected by specific junb deletion in hepatocytes.**

**A:** Serum Ifn $\gamma$  and IL-2 in control mice and c-Jun<sup>Δli\*</sup> mice (c-Jun<sup>fllox/fllox</sup>; MxCre<sup>+T</sup>) 2 hours after ConA. n=6. \*p<0.05.

Western blot for pStat1, Stat1 (**B**) and Irf1 (**C**) in liver extracts of control (JunB<sup>+/fllox</sup>; AlfpCre<sup>+T</sup>) and JunB<sup>Δli</sup> (JunB<sup>fllox/fllox</sup>; AlfpCre<sup>+T</sup>) mice 2 hours after ConA injection. Vinculin is included to control for equal loading. n=4.

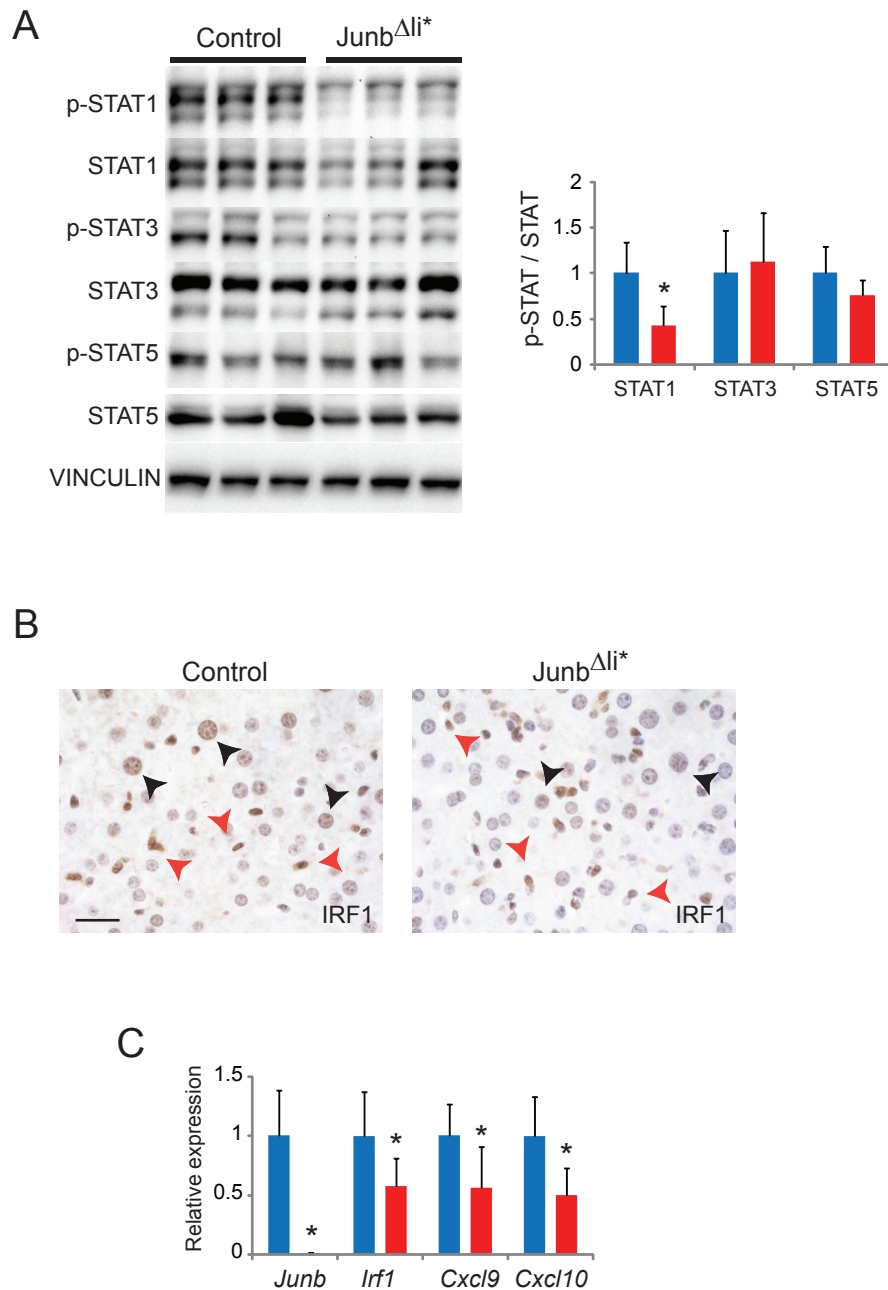

**Figure S7: Decreased Stat1 pathway activation in JunB<sup>Δli\*</sup> mice upon  $\alpha$ Gal-Cer.**

Control and JunB<sup>Δli\*</sup> mice were treated with  $\alpha$ Gal-Cer and liver samples analyzed for Stat pathways.

**A:** Western blot for phosphorylated and total Stat1, 3, 5. Quantification is shown. n=5; \*p < 0.05.

**B:** IHC for Irf1 (brown)  $\alpha$ GalCer-treated controls and JunB<sup>Δli\*</sup> mice for 4 hours. Black arrowheads indicate hepatocyte and red indicate immune cells. n=3. One representative experiment is shown. Scale bar = 20 $\mu$ m.

**C:** qRT-PCR for *junb* and stat-regulated genes 4 hours after treatment. n=5; \*p < 0.05.

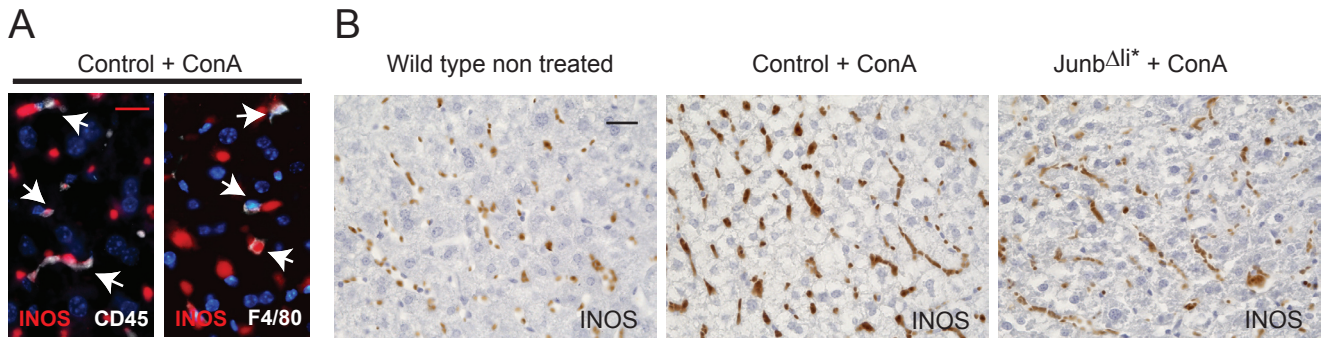

**Figure S8: iNos is strongly expressed in immune cells after ConA.**

Control and JunB<sup>Δli\*</sup> mice were treated with ConA for 2 hours.

**A:** IHF for iNos (red) and CD45 or F4/80 (white) in ConA-treated controls. Double positive cells are indicated with white arrows. n=3. Scale bar = 20µm.

**B:** IHC for iNos (brown) in untreated controls and ConA-treated controls and JunB<sup>Δli\*</sup> mice. n=3. One representative experiment is shown. Scale bar = 25µm.



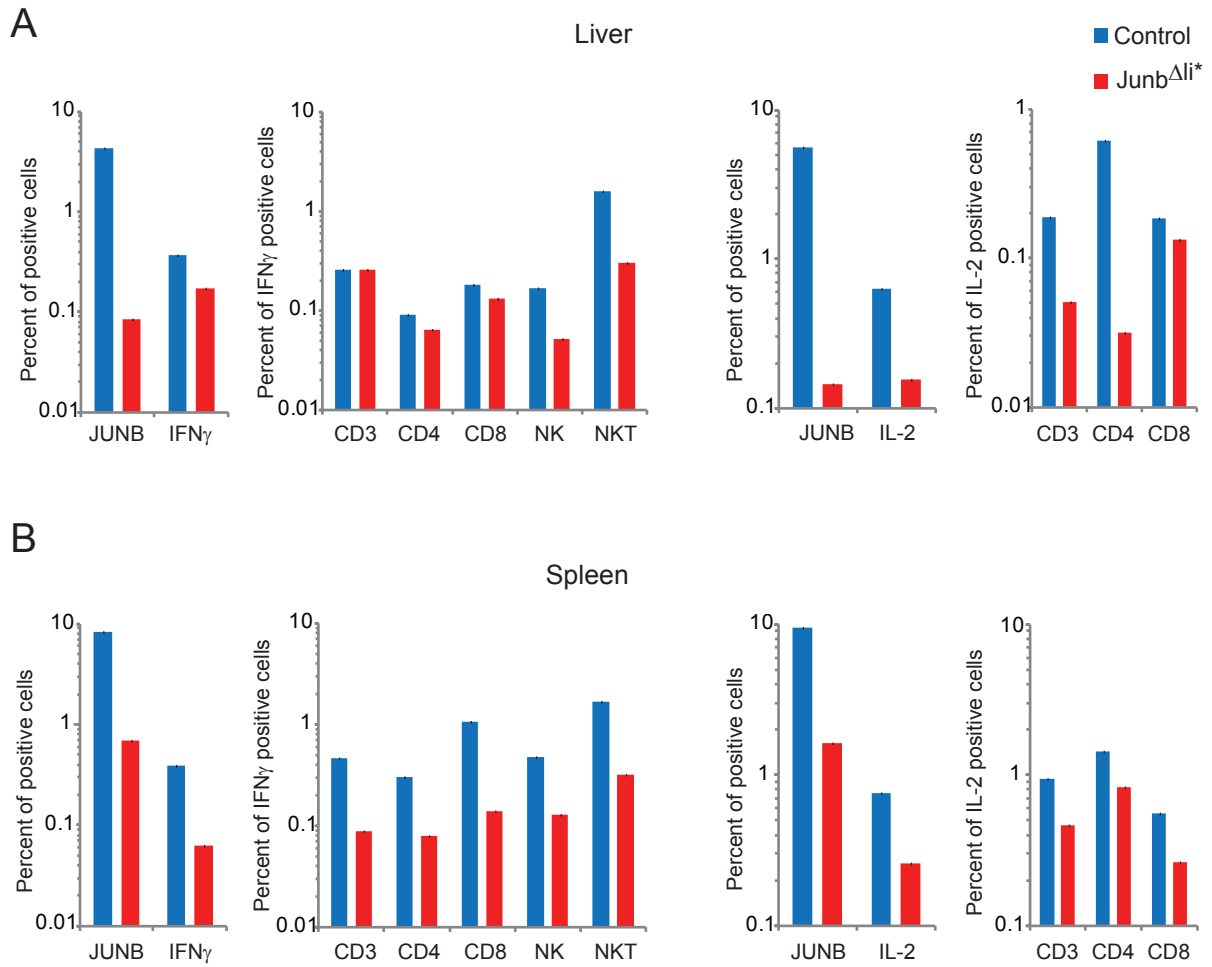

**Figure S9: Intracellular staining for  $\text{Ifn}\gamma$  and IL-2 after *in vivo* stimulation.**

Immune cells isolated from the liver (A) and spleen (B) of control and JunB $\Delta$ li\* mice after treatment with ConA were analyzed by flow cytometry. Cells were stained for  $\text{Ifn}\gamma$  or IL-2 and cell surface markers to discriminate the different cell populations.  $n \geq 2$ , one representative experiment is shown.

**Table 1: Primer sequences**

| <b>Human qPCR Primers</b> | <b>Forward</b>         | <b>Reverse</b>         |
|---------------------------|------------------------|------------------------|
| JUNB                      | AGGCTCGGTTTCAGGAGTTT   | GAACAGCCCTTCTACCACGA   |
| IFNG                      | GTATTGCTTTCGTTGGACA    | GAGTGTGGAGACCATCAAGGA  |
| IL-2                      | GCACTTCCTCCAGAGGTTTG   | ACAAGAATCCCAAACCTCACCA |
| <b>Mouse qPCR Primers</b> | <b>Forward</b>         | <b>Reverse</b>         |
| junb                      | CGCCCGGATGTGCACGAAAATG | GCGCCCCAGGACCTTGAGACC  |
| ifng                      | GAGCTCATTGAATGCTTGCC   | GCGTCATTGAATCACACCTG   |
| il-2                      | TCAAGCTCTACAGCGGAAGC   | AATTCTGTGGCCTGCTTGG    |
| sod2                      | CTGGGGCTGGCTTGGCTTCA   | AGCGTGCTCCCACACGTCAA   |
| gadd45b                   | GGGAGCCGGCGGAGACATTG   | TGGCCACCTCCACCAAGCCT   |
| a20                       | TGCAATGAAGTGCAGGAGTC   | TGGGCTCTGCTGTAGTCCTT   |
| hmox1                     | CACGCATATACCCGCTACCT   | CCAGAGTGTTTCATTCGAGCA  |
| irf1                      | AGGCATCCTTGTTGATGTCC   | AATCCAACCAAATCCCAGG    |
| socs1                     | ACAAGCTGCTACAACCAGGG   | ACTTCTGGCTGGAGACCTCA   |
| socs3                     | AACTTGCTGTGGGTGACCAT   | AAGGCCGGAGATTTGCT      |
| bcl2l1                    | GCTGCATTGTTCCCGTAGAG   | GTTGGATGGCCACCTATCTG   |
| cxcl9                     | TAGGCAGGTTTGATCTCCGT   | CGATCCACTACAAATCCCTCA  |
| cxcl10                    | CTCATCCTGCTGGGTCTGAG   | CCTATGGCCCTCATTCTCAC   |
| nos2                      | GTCGATGTCACATGCAGCTT   | GAAGAAAACCCCTTGTGCTG   |

|                           |                         |                         |
|---------------------------|-------------------------|-------------------------|
| il-6                      | GAAAATCTGCTCTGGTCTTCTGG | TTTTCTGACCACAGTGAGGAATG |
| tnfa                      | CACAGCCTTCCTCACAGAGC    | GGAGGCAACAAGGTAGAGAGG   |
| ifna                      | CCTGATGGTCTTGGTGGTGATAA | CAGTTCCTTCATCCCGACCAG   |
| <b>Human ChIP Primers</b> | <b>Forward</b>          | <b>Reverse</b>          |
| IFNG                      | TGGGATTCTTTGAAGGCACT    | TGCCCCCTTTGTAAAGGTTTG   |
| IL-2                      | TCCAAAGAGTCATCAGAAGAGG  | GGCAGGAGTTGAGGTTACTGTG  |
| <b>Mouse ChIP Primers</b> | <b>Forward</b>          | <b>Reverse</b>          |
| ifng                      | GCTGTGCTCTGTGGATGAGA    | GCTATGGTTTTGTGGCATGTT   |
| il-2                      | TAACCCGACCAAGAGGGATT    | GGCAGAAAGCATTACCTTTG    |
| s16                       | CAAGGCTGCGGAAAAGCA      | CCGTCCGGAACCTCGGAAG     |
